# Supplementary material for: The application of graph theory and percolation analysis for assessing change in the spatial configuration of pond networks
Source: Urban Ecosyst. 2017 Dec 18;21(2):213–25. doi: 10.1007/s11252-017-0724-8 (PMC6560936; doi:10.1007/s11252-017-0724-8)
Supplement: Supplementary file 1 — (DOCX 19 kb) [file 11252_2017_724_MOESM1_ESM.docx]

**Degradation of a pond network during a century of urbanisation: implications for freshwater biodiversity**

Ian Thornhill1*, Lesley Batty1,Matthew Hewitt1,Nikolai R. Friberg2,3,Mark E. Ledger1

1School of Geography, Earth and Environmental Sciences, University of Birmingham, Edgbaston, Birmingham, West Midlands, B15 2TT, United Kingdom

2Norwegian Institute for Water Research (NIVA), Gaustadalléen 21, 0349 Oslo, Norway

3water@leeds, School of Geography, University of Leeds, Leeds LS2 9JT, United Kingdom

*Corresponding author - ian.thornhill@live.co.uk, +044 (0) 1865 318263

**Supplementary material**

Table T1 Known dispersal abilities of some aquatic invertebrates known to inhabit pond environments from multiple studies across temperate regions

| Species | Order | Family | Dispersal distances | Method | Water body type and landscape | Source |
| --- | --- | --- | --- | --- | --- | --- |
| *C. puella*  *C. pulchellum*  *E. cyathigerum*  *I. elegans*  *P. nymphula*  *L. sponsa* | Odonata | Coenagrionidae  Lestidae | <1% >*ca* 600m  (all species) | MRR | Marl pits;  arable and livestock;  U.K. | Conrad et al., 1999 |
| *S. sanguineum* |  | Libellulidae | Max. 1200m |  |  |  |
| *C. puella*  *C. scitulum* | Odonata | Coenagrionidae | 0.9% >725m  1.5% >725m | MRR | Ponds; Arid, karstic; France | Angelibert & Giani, 2003 |
| *C. mercuriale* | Odonata | Coenagrionidae | 65.7% <50m  1.3% >500m  0.1% >1000m | MRR | Water meadow carriers & ditches;  Meadow, agriculture, urban;  U.K. | Rouquette & Thompson, 2007 |
| *C. mercuriale* | Odonata | Coenagrionidae | <500m  ≤4500m | MRR  DNA | Streams, ditches, agricultural, Switzerland | Keller et al., 2010 |
| *I. pumilio* | Odonata | Coenagrionidae | 67.9% <50m /  87.6% <50m  Max. (♀) 575m /263m | MRR | Springs & flushes;  New Forest / Red River valley (rural-residential & agricultural); U.K. | Allen & Thompson, 2010 |
| *E. cyathigerum* | Odonata | Coenagrionidae | 27% >100m | MRR | Not stated | Garrison, 1978 |
| *N. maculata*  *N. obliqua* | Hemiptera | Notonectidae | Max. >1600m | Exhaustive sweep-netting, seasonally | Dewponds;  Peak District National Park, U.K. | Briers, 1998 |
| - | Diptera | Culicidae | Max. <5000m  Max. <1000m | Unknown | Unknown | Service, 1997 |

MRR – Mark-release-recapture NR – Not reported Max. – Study maximum

*Distance travelled by 50% of collected animals (median)
